# Supplementary material for: PD-1 blockade delays tumor growth by inhibiting an intrinsic SHP2/Ras/MAPK signalling in thyroid cancer cells
Source: PubMed Central journal article supplement (PMC7791757; doi:10.1186/s13046-020-01818-1), 2021-01-07

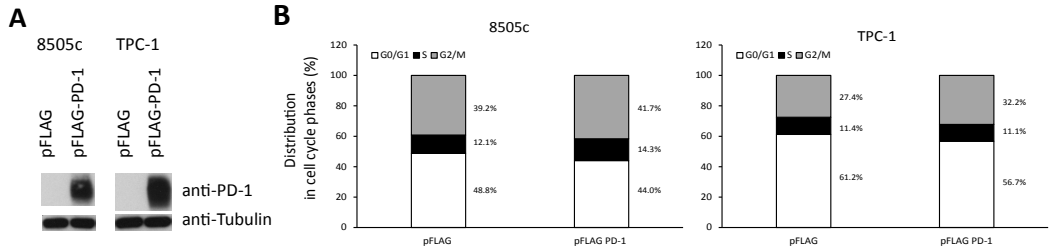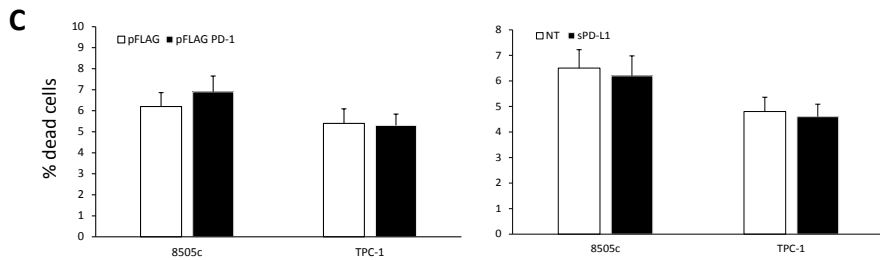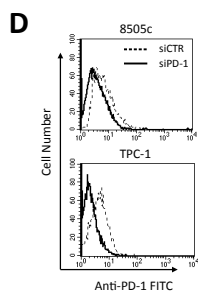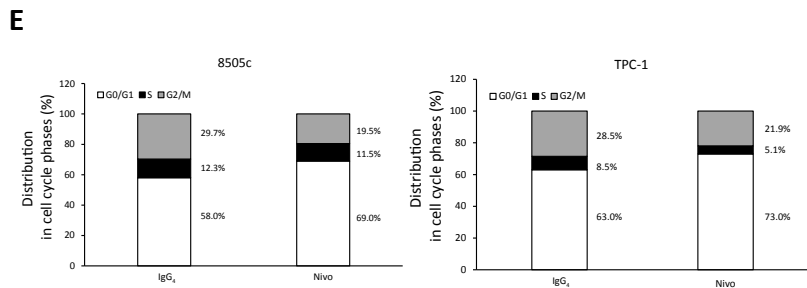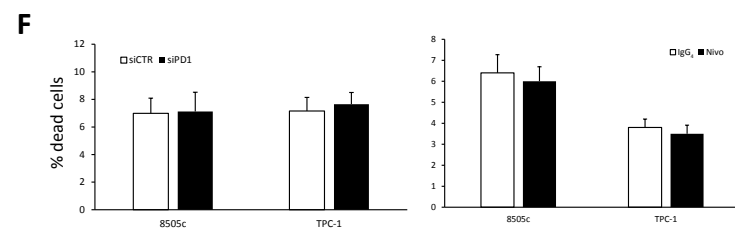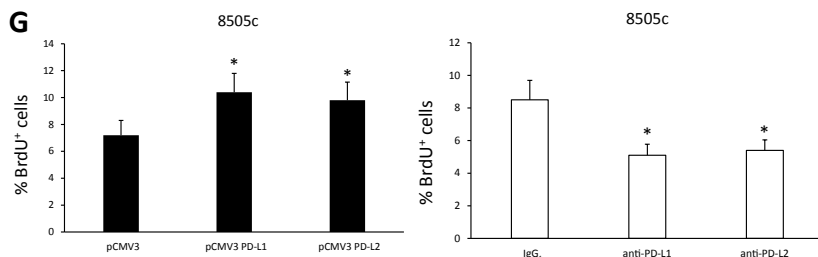

Supplement: 13046_2020_1818_MOESM3_ESM.pdf [file 13046_2020_1818_MOESM3_ESM.pdf]
